# Supplementary material
Source: Royal Society of Chemistry journal article supplement (doi:10.1039/d6tb00649c)
Supplement: d6tb00649c1.pdf [file d6tb00649c1.pdf]

## Coordination-Driven Self-Assembled Nanozyme-Loaded GelMA Microneedles for Enhanced Photodynamic Therapy of Diabetic Infected Wounds

Lisha Jiang<sup>a</sup>, Jiaqiao Liang<sup>d</sup>, Tianyue Wu<sup>d</sup>, Jianyang Shi<sup>c</sup>, Chenggong Hu<sup>b\*</sup>, Haibo Wang<sup>c</sup>

<sup>a</sup> Department of Nuclear Medicine West China Hospital, Sichuan University, Chengdu, 610041, China.

<sup>b</sup> Department of Critical Care Medicine, West China Hospital, Sichuan University, Chengdu, Sichuan, 610041, China.

<sup>c</sup> College of Biomass Science and Engineering, Sichuan University, Chengdu, 610065, PR China.

<sup>d</sup> West China School of Medicine, Sichuan University, Chengdu 610041, China.

\*Correspondence to: Chenggong Hu (E-mail: [huchenggong@scu.edu.cn](mailto:huchenggong@scu.edu.cn))

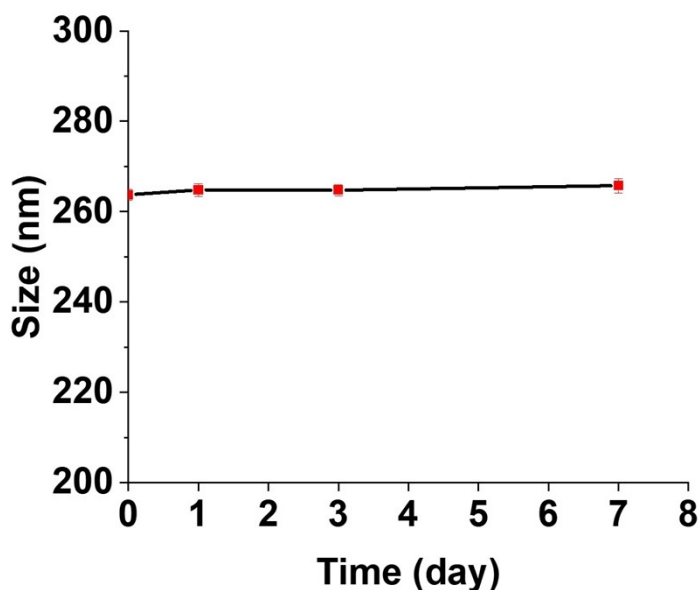

**Figure S1.** Time dependent hydrodynamic size changes of MnFC NPs in PBS at pH 7.4 over 7 days.

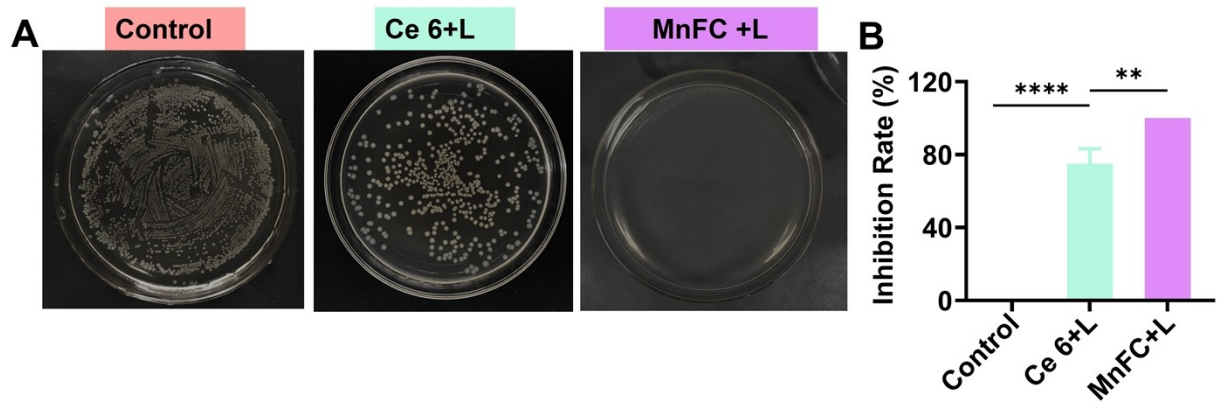

**Figure S2.** (A) Representative colony photographs of *P. aeruginosa* in the Control, Ce6 + L, and MnFC + L groups. (B) Quantitative analysis of the inhibition rate.

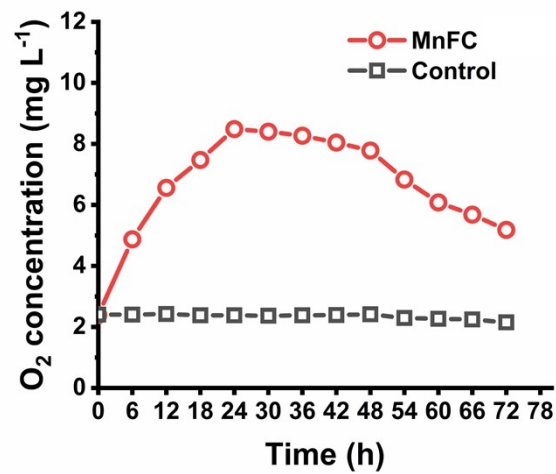

**Figure S3.** Time-dependent dissolved oxygen concentration in simulated diabetic wound exudate.
